# Supplementary material for: Metal fluoride-based transparent nanocomposites with low refractive indices
Source: Royal Society of Chemistry journal article supplement (doi:10.1039/c3dt32652g), 2013-01-01
Supplement: c3dt32652g.pdf [file c3dt32652g.pdf]

## Supporting Information to publication

### “Metal Fluoride-based Transparent Nanocomposites with Low Refractive Index”

**J. Noack, C. Fritz, C. Flügel, F. Hemmann, H.-J. Gläsel, O. Kahle, C. Dreyer, M. Bauer and E. Kemnitz**

5 The XRD patterns of TFA- and PFBA-stabilised  $\text{MgF}_2$  are shown in figure S1. Due to the nanoscopic dimensions of the  $\text{MgF}_2$  particles the reflections are very broad. Comparison with the expected reflection positions (PDF-file #1-1196) identifies the xerogel as rutile  $\text{MgF}_2$ . Addition of carboxylic acids does not induce the dissolution or ripening of magnesium fluoride or the formation of other crystalline phases.

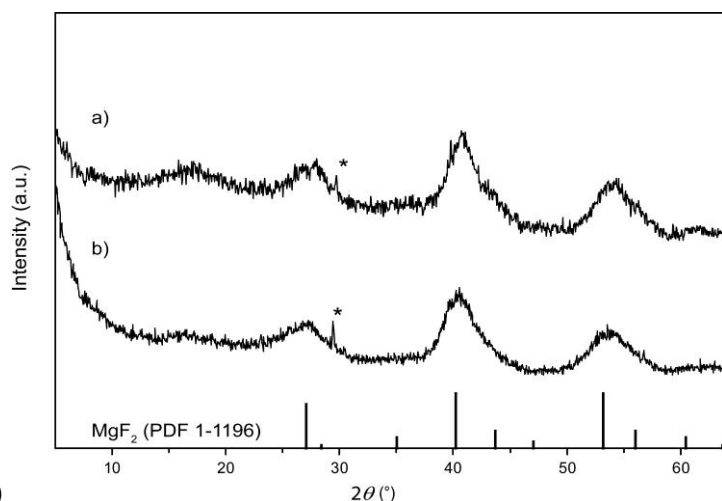

10

**Figure S1:** X-ray diffraction patterns of PFBA- (a) and TFA-stabilised  $\text{MgF}_2$  (b) xerogels.

Figure S2 shows the refractive indices of films with different content of  $\text{MgF}_2$  in a mixture (1:2) of Sartomer CN9010 and Sartomer SR454, applied on silicon wafers by dip-coating, dried at 80°C and polymerised by UV-irradiation. Measurements were conducted by prism coupling technique using  
15 three different laser wavelengths and calculation of refractive index and film thickness from the m-lines. Values are given as the mean of 5 separate measurements with fit errors below 0.1%. The trend of the refractive indices with the respective filler content can be qualitatively described by summation of the volume fractions of each constituent.

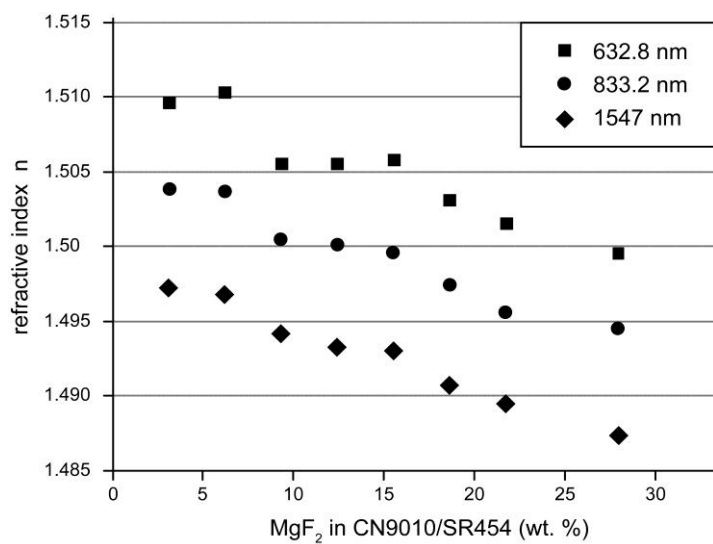

**Figure S2:** Refractive index of composite films of Sartomer® CN9010/SR454 with different filler content of nanoscopic magnesium fluoride; determined by m-line measurements at different wavelengths.
